# Supplementary material for: Identification of Early Zygotic Genes in the Yellow Fever Mosquito Aedes aegypti and Discovery of a Motif Involved in Early Zygotic Genome Activation
Source: PLoS One. 2012 Mar 23;7(3):e33933. doi: 10.1371/journal.pone.0033933 (PMC3311545; doi:10.1371/journal.pone.0033933)
Supplement: File S2 — Numbers of genes with and without introns. (XLSX) [file pone.0033933.s002.xlsx]

## Sheet: Sheet1
	with introns	without introns	total	% without introns
2-4 hr	42	21	63	0.333333
4-8 hr	83	32	115	0.278261
8-12 hr	87	14	101	0.138614
Ae. aegypti	15030	1670	16700	0.1
