# Supplementary material for: Identification of Early Zygotic Genes in the Yellow Fever Mosquito Aedes aegypti and Discovery of a Motif Involved in Early Zygotic Genome Activation
Source: PLoS One. 2012 Mar 23;7(3):e33933. doi: 10.1371/journal.pone.0033933 (PMC3311545; doi:10.1371/journal.pone.0033933)
Supplement: File S3 — Transcript IDs for 2–4, 4–8, 8–12 hr groups (P<0.001) by DEGseq, and IDs for random sequence datasets. (XLSX) [file pone.0033933.s003.xlsx]

## Sheet: S3.txt
2-4hr	4-8hr	8-12hr	Random1	Random2	Random3	All Ae. aegypti
AAEL001456-RA	AAEL008722-RA	AAEL006326-RA	AAEL002083-RA	AAEL008431-RA	AAEL002854-RA	AAEL001456-RA
AAEL014481-RA	AAEL012383-RA	AAEL009955-RA	AAEL016873-RA	AAEL014329-RA	AAEL010152-RA	AAEL014481-RA
AAEL014480-RA	AAEL004149-RA	AAEL008205-RA	AAEL002237-RA	AAEL015095-RA	AAEL007085-RA	AAEL008851-RA
AAEL001543-RA	AAEL000894-RA	AAEL008856-RA	AAEL014231-RA	AAEL000010-RB	AAEL014261-RA	AAEL014480-RA
AAEL006930-RA	AAEL015487-RA	AAEL011180-RA	AAEL010656-RA	AAEL004106-RA	AAEL002433-RA	AAEL001665-RA
AAEL008851-RA	AAEL006476-RA	AAEL009193-RA	AAEL014205-RA	AAEL014179-RA	AAEL002478-RA	AAEL005167-RA
AAEL005167-RA	AAEL008187-RA	AAEL014190-RA	AAEL003399-RA	AAEL003618-RA	AAEL003781-RB	AAEL010651-RA
AAEL011410-RA	AAEL005627-RA	AAEL004814-RA	AAEL011414-RD	AAEL011295-RA	AAEL006913-RA	AAEL005168-RA
AAEL014967-RA	AAEL005480-RA	AAEL009577-RA	AAEL009621-RA	AAEL008153-RA	AAEL013845-RA	AAEL001633-RA
AAEL008471-RA	AAEL011943-RA	AAEL012402-RA	AAEL008048-RA	AAEL013068-RA	AAEL005294-RA	AAEL005164-RA
AAEL005168-RA	AAEL010354-RA	AAEL009967-RA	AAEL004147-RA	AAEL002115-RA	AAEL008419-RA	AAEL006930-RA
AAEL009282-RA	AAEL006167-RA	AAEL004564-RA	AAEL000269-RA	AAEL016286-RA	AAEL008856-RA	AAEL011410-RA
AAEL012193-RA	AAEL014847-RA	AAEL012509-RA	AAEL014338-RA	AAEL009142-RA	AAEL017893-RA	AAEL014967-RA
AAEL005164-RA	AAEL004000-RA	AAEL012536-RA	AAEL012479-RA	AAEL017743-RA	AAEL000201-RA	AAEL004312-RA
AAEL004737-RA	AAEL000336-RA	AAEL011957-RA	AAEL004962-RA	AAEL010108-RA	AAEL011462-RA	AAEL009282-RA
AAEL010651-RA	AAEL011178-RA	AAEL008632-RA	AAEL008913-RA	AAEL007375-RD	AAEL000635-RC	AAEL012193-RA
AAEL001633-RA	AAEL010215-RA	AAEL010681-RA	AAEL006966-RC	AAEL005574-RA	AAEL003368-RA	AAEL011464-RA
AAEL001665-RA	AAEL004344-RA	AAEL011345-RA	AAEL005016-RA	AAEL009532-RA	AAEL006736-RA	AAEL014083-RA
AAEL014083-RA	AAEL007450-RA	AAEL002520-RA	AAEL017621-RA	AAEL003030-RA	AAEL011940-RA	AAEL000789-RA
AAEL012755-RA	AAEL001712-RA	AAEL015661-RA	AAEL005198-RA	AAEL003083-RA	AAEL014936-RA	AAEL002073-RA
AAEL010923-RA	AAEL001696-RA	AAEL003512-RA	AAEL010797-RA	AAEL000528-RA	AAEL013768-RA	AAEL012550-RA
AAEL012550-RA	AAEL007263-RA	AAEL012697-RA	AAEL011278-RB	AAEL007426-RA	AAEL013228-RA	AAEL004737-RA
AAEL000686-RA	AAEL004488-RA	AAEL010917-RA	AAEL004407-RB	AAEL014858-RA	AAEL008978-RA	AAEL007435-RA
AAEL000793-RA	AAEL012331-RA	AAEL014199-RA	AAEL006028-RA	AAEL011354-RA	AAEL014510-RA	AAEL000793-RA
AAEL008008-RA	AAEL005401-RC	AAEL003632-RA	AAEL015086-RB	AAEL000275-RA	AAEL017276-RA	AAEL001543-RA
AAEL012615-RA	AAEL010897-RA	AAEL005499-RA	AAEL011979-RA	AAEL010712-RA	AAEL001482-RA	AAEL000686-RA
AAEL011475-RA	AAEL012982-RA	AAEL012425-RA	AAEL008210-RA	AAEL003350-RA	AAEL003287-RB	AAEL009481-RA
AAEL011464-RA	AAEL004048-RA	AAEL008001-RA	AAEL011747-RA	AAEL006162-RA	AAEL011996-RA	AAEL005514-RA
AAEL012893-RA	AAEL002583-RA	AAEL003622-RA	AAEL005534-RA	AAEL003387-RA	AAEL011164-RA	AAEL001753-RA
AAEL004312-RA	AAEL006609-RA	AAEL001466-RA	AAEL005029-RA	AAEL012481-RA	AAEL006114-RA	AAEL001786-RA
AAEL015284-RA	AAEL012625-RA	AAEL014259-RA	AAEL008060-RA	AAEL013082-RA	AAEL011007-RA	AAEL012755-RA
AAEL000256-RA	AAEL004169-RA	AAEL002172-RA	AAEL009035-RA	AAEL003619-RA	AAEL016630-RA	AAEL004617-RA
AAEL001071-RA	AAEL004319-RA	AAEL014103-RA	AAEL016739-RA	AAEL008616-RA	AAEL003699-RA	AAEL013100-RA
AAEL009087-RA	AAEL002456-RA	AAEL012573-RA	AAEL014099-RA	AAEL001658-RA	AAEL017930-RA	AAEL001377-RA
AAEL002607-RA	AAEL000681-RA	AAEL011452-RA	AAEL009420-RA	AAEL012322-RA	AAEL009080-RA	AAEL008471-RA
AAEL003507-RA	AAEL002959-RA	AAEL002907-RA	AAEL000950-RA	AAEL017958-RA	AAEL005217-RA	AAEL001376-RA
AAEL006944-RA	AAEL011231-RA	AAEL001620-RA	AAEL017268-RA	AAEL016922-RA	AAEL010381-RA	AAEL011224-RA
AAEL012948-RA	AAEL010924-RA	AAEL001878-RA	AAEL008169-RA	AAEL014725-RA	AAEL006129-RA	AAEL013787-RA
AAEL008860-RA	AAEL003560-RA	AAEL002713-RA	AAEL014569-RA	AAEL016954-RA	AAEL007443-RA	AAEL009386-RA
AAEL013399-RA	AAEL010061-RA	AAEL003622-RB	AAEL003268-RA	AAEL004071-RA	AAEL000522-RA	AAEL014374-RA
AAEL005005-RA	AAEL000473-RA	AAEL011676-RA	AAEL014579-RA	AAEL003530-RA	AAEL010219-RA	AAEL000601-RA
AAEL009481-RA	AAEL010513-RA	AAEL012859-RA	AAEL011379-RA	AAEL016464-RA	AAEL017768-RA	AAEL001678-RA
AAEL000789-RA	AAEL009645-RA	AAEL004208-RA	AAEL000716-RA	AAEL014603-RA	AAEL009032-RA	AAEL011475-RA
AAEL004841-RA	AAEL009645-RB	AAEL012575-RA	AAEL004098-RA	AAEL002929-RA	AAEL008366-RA	AAEL001071-RA
AAEL004841-RB	AAEL002604-RA	AAEL003247-RA	AAEL001108-RA	AAEL017462-RB	AAEL002892-RA	AAEL000664-RA
AAEL003277-RA	AAEL010466-RA	AAEL001836-RA	AAEL002436-RB	AAEL006949-RA	AAEL012367-RA	AAEL005887-RA
AAEL012856-RA	AAEL007473-RA	AAEL005619-RA	AAEL003097-RA	AAEL006399-RA	AAEL012133-RA	AAEL012856-RA
AAEL010149-RA	AAEL014355-RA	AAEL015628-RA	AAEL006774-RA	AAEL004351-RA	AAEL004152-RA	AAEL004411-RA
AAEL002397-RA	AAEL009899-RA	AAEL009199-RA	AAEL002190-RA	AAEL017275-RA	AAEL006930-RA	AAEL006944-RA
AAEL006455-RA	AAEL009136-RA	AAEL014664-RA	AAEL012008-RA	AAEL005030-RA	AAEL011263-RA	AAEL012893-RA
AAEL001481-RA	AAEL000489-RA	AAEL007342-RA	AAEL017073-RA	AAEL002745-RA	AAEL004376-RA	AAEL010528-RA
AAEL002930-RA	AAEL009329-RA	AAEL012654-RA	AAEL000830-RA	AAEL012113-RA	AAEL004844-RA	AAEL006215-RA
AAEL010098-RA	AAEL015058-RA	AAEL002555-RA	AAEL015054-RA	AAEL000495-RA	AAEL004548-RA	AAEL000610-RA
AAEL000610-RA	AAEL004197-RA	AAEL005988-RA	AAEL001288-RA	AAEL002835-RA	AAEL000878-RA	AAEL002403-RA
AAEL009629-RA	AAEL001438-RA	AAEL009095-RA	AAEL001145-RA	AAEL012107-RA	AAEL003389-RA	AAEL010923-RA
AAEL009818-RB	AAEL005248-RA	AAEL011926-RA	AAEL012947-RA	AAEL011278-RA	AAEL007279-RA	AAEL009087-RA
AAEL014696-RA	AAEL003339-RA	AAEL001293-RA	AAEL008571-RA	AAEL007500-RA	AAEL005251-RA	AAEL015284-RA
AAEL004089-RA	AAEL000656-RA	AAEL001293-RB	AAEL009600-RA	AAEL000497-RA	AAEL016355-RA	AAEL004841-RA
AAEL004219-RA	AAEL001639-RA	AAEL006814-RA	AAEL006922-RB	AAEL002840-RA	AAEL017536-RA	AAEL004841-RB
AAEL009560-RA	AAEL010956-RA	AAEL000419-RA	AAEL013280-RA	AAEL000338-RA	AAEL011877-RA	AAEL004392-RA
AAEL004617-RA	AAEL001594-RA	AAEL001293-RC	AAEL014607-RA	AAEL007798-RA	AAEL006920-RA	AAEL012322-RA
AAEL009818-RA	AAEL001475-RA	AAEL008186-RA	AAEL004582-RA	AAEL005926-RA	AAEL007114-RB	AAEL007262-RA
AAEL010472-RA	AAEL011942-RA	AAEL002001-RA	AAEL017343-RA	AAEL000997-RA	AAEL003274-RA	AAEL005555-RA
	AAEL014948-RA	AAEL000471-RA				AAEL009560-RA
	AAEL005698-RA	AAEL008903-RA				AAEL015521-RA
	AAEL011672-RA	AAEL011011-RA				AAEL003200-RA
	AAEL001499-RA	AAEL001988-RA				AAEL003200-RB
	AAEL013364-RA	AAEL015180-RA				AAEL004248-RA
	AAEL003633-RA	AAEL001980-RA				AAEL013606-RA
	AAEL008346-RA	AAEL002007-RA				AAEL003237-RA
	AAEL004508-RA	AAEL003504-RA				AAEL002607-RA
	AAEL006047-RA	AAEL015017-RA				AAEL009818-RB
	AAEL013759-RA	AAEL012606-RA				AAEL008008-RA
	AAEL001907-RA	AAEL008141-RA				AAEL012948-RA
	AAEL000505-RA	AAEL011407-RA				AAEL010445-RA
	AAEL000104-RA	AAEL013184-RA				AAEL000571-RA
	AAEL010079-RA	AAEL000929-RA				AAEL014213-RA
	AAEL012544-RA	AAEL014604-RA				AAEL001481-RA
	AAEL001368-RA	AAEL015448-RA				AAEL006238-RB
	AAEL013637-RA	AAEL008654-RA				AAEL010149-RA
	AAEL012164-RA	AAEL001987-RA				AAEL006238-RA
	AAEL006310-RA	AAEL005316-RA				AAEL006996-RA
	AAEL012332-RA	AAEL003408-RA				AAEL009492-RA
	AAEL011234-RA	AAEL012688-RA				AAEL010098-RA
	AAEL004715-RA	AAEL004206-RA				AAEL001306-RA
	AAEL000056-RA	AAEL007844-RA				AAEL005757-RA
	AAEL012060-RA	AAEL014450-RA				AAEL007207-RA
	AAEL010454-RA	AAEL006828-RA				AAEL004346-RA
	AAEL002171-RA	AAEL002824-RA				AAEL013399-RA
	AAEL010309-RA	AAEL001259-RA				AAEL012658-RA
	AAEL000684-RA	AAEL007852-RA				AAEL014696-RA
	AAEL010596-RA	AAEL008342-RA				AAEL004089-RA
	AAEL010979-RA	AAEL012087-RA				AAEL011976-RA
	AAEL000838-RA	AAEL014595-RA				AAEL002930-RA
	AAEL008969-RA	AAEL014006-RA				AAEL015465-RA
	AAEL005030-RA	AAEL014663-RA				AAEL000256-RA
	AAEL007205-RA	AAEL006540-RA				AAEL011621-RA
	AAEL006092-RA	AAEL012341-RA				AAEL002434-RA
	AAEL011169-RA	AAEL003150-RA				AAEL007571-RA
	AAEL011422-RA	AAEL007226-RA				AAEL009818-RA
	AAEL003726-RA	AAEL005337-RA				AAEL013523-RA
	AAEL012106-RA					AAEL005156-RA
	AAEL000671-RA					AAEL000830-RA
	AAEL008773-RA					AAEL001579-RA
	AAEL015641-RA					AAEL014351-RA
	AAEL005249-RA					AAEL014175-RA
	AAEL011458-RA					AAEL004219-RA
	AAEL006831-RA					AAEL012571-RA
	AAEL011716-RA					AAEL011525-RA
	AAEL004687-RA					AAEL013032-RA
	AAEL001355-RA					AAEL002397-RA
	AAEL012210-RA					AAEL005005-RA
	AAEL013649-RA					AAEL007199-RA
	AAEL002231-RA					AAEL007396-RA
	AAEL011421-RA					AAEL012615-RA
						AAEL012024-RA
						AAEL001138-RA
						AAEL003277-RA
						AAEL010472-RA
						AAEL009663-RA
						AAEL005237-RA
						AAEL009687-RA
						AAEL009046-RA
						AAEL009032-RA
						AAEL005329-RA
						AAEL003614-RA
						AAEL002224-RA
						AAEL002899-RA
						AAEL008361-RA
						AAEL008361-RB
						AAEL006225-RA
						AAEL012184-RA
						AAEL006962-RB
						AAEL001889-RA
						AAEL009568-RA
						AAEL013053-RA
						AAEL007553-RA
						AAEL010337-RA
						AAEL002549-RA
						AAEL010122-RA
						AAEL009561-RA
						AAEL006168-RA
						AAEL005855-RA
						AAEL006962-RA
						AAEL013702-RA
						AAEL007511-RA
						AAEL008820-RA
						AAEL004612-RA
						AAEL005574-RA
						AAEL013013-RA
						AAEL011515-RA
						AAEL006768-RA
						AAEL011015-RA
						AAEL014714-RA
						AAEL004155-RA
						AAEL009629-RA
						AAEL011248-RA
						AAEL008860-RA
						AAEL011859-RA
						AAEL006455-RA
						AAEL011426-RA
						AAEL006261-RA
						AAEL003051-RA
						AAEL014340-RA
						AAEL014340-RB
						AAEL009836-RA
						AAEL001082-RA
						AAEL007890-RA
						AAEL005393-RA
						AAEL014302-RA
						AAEL005941-RA
						AAEL000379-RA
						AAEL003507-RA
						AAEL010337-RB
						AAEL005427-RA
						AAEL009683-RA
						AAEL012450-RA
						AAEL002617-RA
						AAEL013125-RA
						AAEL003464-RA
						AAEL001148-RA
						AAEL006464-RA
						AAEL012335-RA
						AAEL006233-RA
						AAEL006233-RB
						AAEL002582-RA
						AAEL002582-RB
						AAEL014348-RA
						AAEL014348-RB
						AAEL008262-RA
						AAEL007603-RA
						AAEL010257-RA
						AAEL001373-RA
						AAEL006878-RA
						AAEL011239-RA
						AAEL001500-RA
						AAEL009554-RA
						AAEL001018-RA
						AAEL006716-RA
						AAEL012206-RA
						AAEL011890-RA
						AAEL002592-RA
						AAEL005517-RA
						AAEL011987-RA
						AAEL006759-RA
						AAEL014909-RA
						AAEL003577-RA
						AAEL000035-RA
						AAEL007819-RA
						AAEL015090-RA
						AAEL013556-RA
						AAEL000374-RA
						AAEL012194-RA
						AAEL004373-RA
						AAEL007221-RA
						AAEL001346-RA
						AAEL000992-RA
						AAEL006921-RA
						AAEL013604-RA
						AAEL007978-RA
						AAEL013000-RA
						AAEL013518-RA
						AAEL010068-RA
						AAEL004157-RA
						AAEL010720-RA
						AAEL005729-RA
						AAEL005701-RA
						AAEL000912-RA
						AAEL010929-RA
						AAEL006770-RA
						AAEL010683-RA
						AAEL002678-RA
						AAEL012933-RA
						AAEL005868-RA
						AAEL009638-RA
						AAEL013245-RA
						AAEL005372-RA
						AAEL011726-RA
						AAEL001319-RA
						AAEL000566-RA
						AAEL007419-RA
						AAEL015577-RA
						AAEL006682-RA
						AAEL014559-RA
						AAEL010664-RA
						AAEL003958-RA
						AAEL009252-RA
						AAEL011643-RA
						AAEL003727-RA
						AAEL007927-RA
						AAEL014878-RA
						AAEL009707-RA
						AAEL013008-RA
						AAEL002124-RA
						AAEL011053-RA
						AAEL005773-RA
						AAEL001881-RA
						AAEL010325-RA
						AAEL000271-RC
						AAEL000039-RA
						AAEL013607-RA
						AAEL008423-RA
						AAEL007369-RA
						AAEL013517-RA
						AAEL014131-RA
						AAEL002759-RB
						AAEL011970-RA
						AAEL008710-RA
						AAEL007614-RA
						AAEL006563-RA
						AAEL012399-RA
						AAEL012703-RA
						AAEL012696-RA
						AAEL013766-RA
						AAEL005647-RA
						AAEL013525-RA
						AAEL006266-RA
						AAEL013602-RA
						AAEL000271-RA
						AAEL009834-RA
						AAEL009162-RA
						AAEL003271-RA
						AAEL005762-RA
						AAEL001309-RA
						AAEL000092-RA
						AAEL003132-RA
						AAEL010416-RA
						AAEL012881-RA
						AAEL010139-RA
						AAEL012138-RB
						AAEL007815-RA
						AAEL001068-RA
						AAEL003067-RA
						AAEL003301-RA
						AAEL013912-RA
						AAEL013997-RA
						AAEL003020-RA
						AAEL007222-RA
						AAEL002759-RA
						AAEL002759-RC
						AAEL002759-RD
						AAEL000061-RA
						AAEL011365-RA
						AAEL010859-RA
						AAEL004539-RA
						AAEL005657-RA
						AAEL009563-RA
						AAEL004695-RA
						AAEL014191-RA
						AAEL004576-RA
						AAEL003930-RA
						AAEL003158-RA
						AAEL010634-RA
						AAEL010863-RA
						AAEL013336-RA
						AAEL007272-RA
						AAEL004498-RA
						AAEL002894-RA
						AAEL010194-RA
						AAEL012138-RA
						AAEL014277-RA
						AAEL002568-RA
						AAEL013793-RA
						AAEL007232-RA
						AAEL001208-RA
						AAEL013120-RA
						AAEL000371-RA
						AAEL000271-RB
						AAEL001844-RA
						AAEL001281-RA
						AAEL013186-RA
						AAEL003918-RA
						AAEL008299-RA
						AAEL004748-RA
						AAEL012052-RA
						AAEL003806-RA
						AAEL004079-RA
						AAEL008054-RA
						AAEL007991-RA
						AAEL014852-RA
						AAEL010884-RA
						AAEL005059-RA
						AAEL006636-RA
						AAEL009223-RA
						AAEL012837-RA
						AAEL013349-RA
						AAEL013623-RA
						AAEL013350-RA
						AAEL001463-RA
						AAEL004906-RA
						AAEL013934-RA
						AAEL005124-RA
						AAEL001219-RA
						AAEL004249-RB
						AAEL000083-RA
						AAEL000989-RA
						AAEL003221-RA
						AAEL007860-RA
						AAEL014937-RA
						AAEL015447-RA
						AAEL014435-RA
						AAEL011828-RA
						AAEL015232-RA
						AAEL010221-RA
						AAEL003067-RB
						AAEL009432-RA
						AAEL015538-RA
						AAEL006994-RA
						AAEL012542-RA
						AAEL004249-RA
						AAEL009114-RA
						AAEL003053-RE
						AAEL010490-RA
						AAEL010490-RB
						AAEL000166-RA
						AAEL007438-RA
						AAEL005948-RA
						AAEL009180-RA
						AAEL000037-RA
						AAEL002519-RA
						AAEL009478-RA
						AAEL009777-RA
						AAEL015473-RA
						AAEL013683-RA
						AAEL005955-RA
						AAEL001027-RA
						AAEL010627-RA
						AAEL007766-RA
						AAEL001524-RA
						AAEL003380-RA
						AAEL000352-RA
						AAEL004789-RA
						AAEL005229-RA
						AAEL014857-RA
						AAEL008066-RA
						AAEL009052-RA
						AAEL013938-RA
						AAEL009845-RA
						AAEL001337-RA
						AAEL002164-RA
						AAEL003478-RA
						AAEL009181-RA
						AAEL015672-RA
						AAEL013758-RA
						AAEL006272-RA
						AAEL000119-RA
						AAEL001444-RA
						AAEL005195-RA
						AAEL002990-RA
						AAEL002655-RA
						AAEL007611-RA
						AAEL006355-RA
						AAEL005196-RA
						AAEL006736-RA
						AAEL000780-RA
						AAEL013656-RA
						AAEL003761-RA
						AAEL015451-RA
						AAEL004245-RA
						AAEL001474-RA
						AAEL013730-RA
						AAEL000607-RA
						AAEL006410-RA
						AAEL011305-RA
						AAEL011966-RA
						AAEL013737-RA
						AAEL013056-RA
						AAEL003069-RA
						AAEL013648-RA
						AAEL007769-RA
						AAEL002484-RA
						AAEL010452-RA
						AAEL007408-RA
						AAEL006287-RA
						AAEL001535-RA
						AAEL014654-RA
						AAEL013201-RA
						AAEL014151-RA
						AAEL012477-RA
						AAEL013224-RA
						AAEL000668-RA
						AAEL010113-RA
						AAEL005723-RA
						AAEL009214-RA
						AAEL002577-RA
						AAEL003219-RA
						AAEL013434-RB
						AAEL004093-RA
						AAEL013840-RA
						AAEL011922-RA
						AAEL010346-RA
						AAEL013434-RA
						AAEL004575-RA
						AAEL010789-RA
						AAEL007716-RA
						AAEL014227-RA
						AAEL007096-RA
						AAEL004967-RA
						AAEL002333-RA
						AAEL000252-RA
						AAEL010775-RA
						AAEL014446-RA
						AAEL001669-RA
						AAEL011037-RA
						AAEL009717-RA
						AAEL011768-RA
						AAEL009853-RA
						AAEL004836-RA
						AAEL010876-RA
						AAEL010220-RA
						AAEL010220-RB
						AAEL004086-RA
						AAEL006894-RA
						AAEL013130-RA
						AAEL000530-RA
						AAEL007002-RA
						AAEL011227-RA
						AAEL004753-RA
						AAEL015009-RA
						AAEL005285-RA
						AAEL006051-RA
						AAEL003460-RA
						AAEL001094-RA
						AAEL003794-RA
						AAEL005542-RA
						AAEL007559-RA
						AAEL004205-RA
						AAEL002348-RA
						AAEL003186-RA
						AAEL002570-RA
						AAEL007806-RA
						AAEL003399-RA
						AAEL002505-RA
						AAEL007722-RA
						AAEL000729-RA
						AAEL007266-RA
						AAEL010700-RA
						AAEL011902-RA
						AAEL005021-RA
						AAEL003279-RA
						AAEL009567-RA
						AAEL007294-RA
						AAEL015154-RA
						AAEL013446-RA
						AAEL011784-RA
						AAEL005785-RA
						AAEL000968-RA
						AAEL004432-RA
						AAEL012695-RA
						AAEL012977-RA
						AAEL012385-RA
						AAEL002288-RA
						AAEL002882-RA
						AAEL010297-RA
						AAEL010417-RA
						AAEL003547-RA
						AAEL001094-RB
						AAEL006815-RA
						AAEL001660-RA
						AAEL005350-RA
						AAEL007379-RA
						AAEL001592-RA
						AAEL003765-RA
						AAEL004536-RA
						AAEL012436-RA
						AAEL013601-RA
						AAEL011883-RA
						AAEL012396-RA
						AAEL009673-RA
						AAEL005194-RA
						AAEL001179-RA
						AAEL014115-RA
						AAEL014369-RA
						AAEL013259-RA
						AAEL000165-RA
						AAEL005828-RA
						AAEL013298-RA
						AAEL004187-RA
						AAEL013297-RA
						AAEL006761-RA
						AAEL000603-RA
						AAEL000811-RA
						AAEL001292-RA
						AAEL000309-RA
						AAEL012633-RA
						AAEL002018-RA
						AAEL008791-RA
						AAEL007265-RA
						AAEL004883-RA
						AAEL003240-RA
						AAEL006293-RA
						AAEL014993-RA
						AAEL011639-RA
						AAEL005460-RA
						AAEL010385-RA
						AAEL012773-RA
						AAEL002632-RA
						AAEL003593-RA
						AAEL003738-RA
						AAEL013612-RA
						AAEL006296-RA
						AAEL000381-RA
						AAEL009045-RA
						AAEL011056-RA
						AAEL003081-RA
						AAEL004674-RA
						AAEL014719-RA
						AAEL012517-RA
						AAEL009963-RA
						AAEL004099-RA
						AAEL013773-RA
						AAEL005743-RA
						AAEL008822-RA
						AAEL000954-RA
						AAEL003481-RA
						AAEL004418-RA
						AAEL009966-RA
						AAEL009300-RA
						AAEL007561-RA
						AAEL008826-RA
						AAEL009343-RA
						AAEL013377-RA
						AAEL001652-RA
						AAEL003596-RA
						AAEL006178-RA
						AAEL002743-RA
						AAEL007010-RA
						AAEL006414-RA
						AAEL012796-RA
						AAEL000066-RA
						AAEL010075-RA
						AAEL001693-RA
						AAEL001963-RA
						AAEL007143-RA
						AAEL001724-RA
						AAEL007818-RA
						AAEL007818-RB
						AAEL005247-RA
						AAEL013900-RA
						AAEL013535-RA
						AAEL007607-RA
						AAEL001167-RA
						AAEL015472-RA
						AAEL001566-RA
						AAEL012191-RA
						AAEL010879-RA
						AAEL004451-RA
						AAEL007359-RA
						AAEL002143-RA
						AAEL004257-RA
						AAEL009925-RA
						AAEL014866-RA
						AAEL003498-RA
						AAEL009936-RA
						AAEL005668-RA
						AAEL002096-RA
						AAEL010545-RA
						AAEL004580-RA
						AAEL009178-RA
						AAEL012065-RA
						AAEL001523-RA
						AAEL011165-RA
						AAEL009292-RA
						AAEL009537-RA
						AAEL007305-RA
						AAEL014318-RA
						AAEL014772-RA
						AAEL003259-RA
						AAEL000356-RA
						AAEL000309-RB
						AAEL015352-RA
						AAEL008269-RA
						AAEL004174-RA
						AAEL007299-RA
						AAEL004261-RA
						AAEL014085-RA
						AAEL000283-RA
						AAEL006490-RA
						AAEL013576-RA
						AAEL014556-RA
						AAEL015053-RA
						AAEL002560-RB
						AAEL013821-RA
						AAEL012170-RA
						AAEL001291-RA
						AAEL008750-RA
						AAEL011831-RA
						AAEL004030-RA
						AAEL013882-RA
						AAEL000519-RA
						AAEL014416-RA
						AAEL001735-RA
						AAEL012232-RA
						AAEL000150-RA
						AAEL000146-RA
						AAEL011901-RA
						AAEL013861-RA
						AAEL000814-RA
						AAEL010951-RA
						AAEL009205-RA
						AAEL005763-RA
						AAEL002099-RA
						AAEL001528-RA
						AAEL003977-RA
						AAEL011512-RA
						AAEL009449-RA
						AAEL012301-RA
						AAEL006250-RA
						AAEL007531-RA
						AAEL005123-RA
						AAEL002088-RA
						AAEL015417-RA
						AAEL010649-RA
						AAEL012728-RA
						AAEL005294-RA
						AAEL008093-RA
						AAEL009763-RA
						AAEL004622-RA
						AAEL002946-RA
						AAEL003714-RA
						AAEL014445-RA
						AAEL003638-RA
						AAEL002269-RA
						AAEL008387-RA
						AAEL003707-RA
						AAEL008106-RA
						AAEL012101-RA
						AAEL003128-RA
						AAEL013432-RA
						AAEL014332-RA
						AAEL002524-RA
						AAEL012560-RA
						AAEL005777-RA
						AAEL005560-RA
						AAEL013414-RA
						AAEL005633-RA
						AAEL012988-RA
						AAEL004478-RA
						AAEL006206-RA
						AAEL011702-RA
						AAEL011623-RA
						AAEL008487-RA
						AAEL008488-RA
						AAEL004707-RA
						AAEL012635-RA
						AAEL008912-RA
						AAEL004253-RA
						AAEL004864-RA
						AAEL014950-RA
						AAEL001189-RA
						AAEL015239-RA
						AAEL003564-RA
						AAEL002560-RA
						AAEL004259-RA
						AAEL006537-RA
						AAEL009384-RA
						AAEL009116-RA
						AAEL014791-RA
						AAEL009296-RA
						AAEL005750-RA
						AAEL003625-RA
						AAEL010186-RA
						AAEL002952-RA
						AAEL001565-RA
						AAEL000316-RA
						AAEL004268-RA
						AAEL014888-RA
						AAEL012353-RA
						AAEL010132-RA
						AAEL007493-RA
						AAEL002908-RA
						AAEL002721-RA
						AAEL002684-RA
						AAEL008264-RA
						AAEL003553-RA
						AAEL005242-RA
						AAEL005641-RA
						AAEL009467-RA
						AAEL014421-RA
						AAEL006766-RA
						AAEL003618-RA
						AAEL010151-RA
						AAEL015227-RA
						AAEL007339-RA
						AAEL015307-RA
						AAEL015095-RA
						AAEL006334-RA
						AAEL014076-RA
						AAEL007364-RA
						AAEL003429-RA
						AAEL001408-RA
						AAEL015542-RA
						AAEL009233-RA
						AAEL014135-RA
						AAEL013383-RA
						AAEL013104-RA
						AAEL003319-RA
						AAEL005306-RA
						AAEL002815-RA
						AAEL011599-RA
						AAEL010377-RA
						AAEL006477-RA
						AAEL009848-RA
						AAEL004391-RA
						AAEL014226-RA
						AAEL012346-RA
						AAEL014556-RB
						AAEL015053-RB
						AAEL009541-RA
						AAEL003807-RA
						AAEL004192-RA
						AAEL013347-RA
						AAEL004729-RA
						AAEL005507-RA
						AAEL001262-RA
						AAEL006194-RA
						AAEL006657-RA
						AAEL003331-RA
						AAEL005927-RA
						AAEL006357-RA
						AAEL001851-RA
						AAEL003066-RB
						AAEL002153-RA
						AAEL011027-RA
						AAEL012513-RA
						AAEL008754-RA
						AAEL001758-RA
						AAEL003934-RA
						AAEL015288-RA
						AAEL001483-RA
						AAEL013405-RA
						AAEL009897-RA
						AAEL012759-RA
						AAEL008757-RA
						AAEL013179-RA
						AAEL004673-RA
						AAEL002750-RA
						AAEL005545-RA
						AAEL014045-RA
						AAEL004761-RA
						AAEL009005-RA
						AAEL007037-RA
						AAEL007039-RA
						AAEL010442-RA
						AAEL010654-RA
						AAEL000498-RA
						AAEL010785-RA
						AAEL009950-RA
						AAEL014600-RA
						AAEL005849-RA
						AAEL002409-RA
						AAEL014096-RA
						AAEL010567-RA
						AAEL001010-RA
						AAEL004524-RA
						AAEL003291-RA
						AAEL011486-RA
						AAEL001380-RA
						AAEL010477-RA
						AAEL012824-RA
						AAEL014594-RA
						AAEL002385-RA
						AAEL005792-RA
						AAEL000288-RA
						AAEL002972-RA
						AAEL011405-RA
						AAEL007648-RA
						AAEL002057-RA
						AAEL008652-RA
						AAEL015251-RA
						AAEL010049-RA
						AAEL010443-RA
						AAEL012254-RA
						AAEL015565-RA
						AAEL002916-RA
						AAEL004780-RA
						AAEL002792-RA
						AAEL001328-RA
						AAEL010111-RA
						AAEL002515-RA
						AAEL015326-RA
						AAEL009980-RA
						AAEL010310-RA
						AAEL006494-RA
						AAEL004602-RA
						AAEL011419-RA
						AAEL010313-RA
						AAEL010438-RA
						AAEL007736-RA
						AAEL001697-RA
						AAEL011945-RA
						AAEL011706-RA
						AAEL006055-RA
						AAEL014653-RA
						AAEL010429-RA
						AAEL010431-RA
						AAEL013577-RA
						AAEL013577-RB
						AAEL013577-RC
						AAEL012543-RA
						AAEL014741-RA
						AAEL003889-RA
						AAEL014563-RA
						AAEL009015-RA
						AAEL001796-RA
						AAEL011583-RA
						AAEL002572-RA
						AAEL010044-RA
						AAEL003053-RF
						AAEL011263-RA
						AAEL013077-RA
						AAEL003305-RA
						AAEL015670-RA
						AAEL004908-RA
						AAEL000788-RA
						AAEL002780-RA
						AAEL000043-RA
						AAEL004171-RA
						AAEL003041-RA
						AAEL000012-RA
						AAEL010096-RA
						AAEL004446-RA
						AAEL000972-RA
						AAEL001536-RA
						AAEL013724-RA
						AAEL015092-RA
						AAEL004335-RA
						AAEL005218-RA
						AAEL005218-RB
						AAEL005908-RA
						AAEL007889-RA
						AAEL006008-RA
						AAEL006170-RA
						AAEL008297-RA
						AAEL011259-RA
						AAEL004810-RA
						AAEL004135-RA
						AAEL005738-RA
						AAEL003557-RA
						AAEL004231-RA
						AAEL013308-RA
						AAEL003501-RA
						AAEL007802-RA
						AAEL015321-RA
						AAEL003017-RA
						AAEL002635-RA
						AAEL014404-RA
						AAEL003920-RA
						AAEL003066-RA
						AAEL001637-RA
						AAEL010741-RA
						AAEL014242-RA
						AAEL011579-RA
						AAEL014823-RA
						AAEL014966-RA
						AAEL013111-RA
						AAEL005218-RC
						AAEL014798-RA
						AAEL006849-RA
						AAEL003053-RB
						AAEL007146-RA
						AAEL009920-RA
						AAEL002727-RA
						AAEL003997-RA
						AAEL015471-RA
						AAEL001701-RA
						AAEL002665-RA
						AAEL003322-RA
						AAEL009125-RA
						AAEL009125-RB
						AAEL008769-RA
						AAEL011936-RA
						AAEL008775-RA
						AAEL013231-RA
						AAEL010848-RA
						AAEL010631-RA
						AAEL008651-RA
						AAEL006626-RA
						AAEL008757-RB
						AAEL007807-RA
						AAEL010676-RA
						AAEL000496-RB
						AAEL008780-RA
						AAEL005465-RA
						AAEL003570-RA
						AAEL003442-RA
						AAEL001703-RA
						AAEL009171-RA
						AAEL014539-RA
						AAEL010382-RA
						AAEL001850-RA
						AAEL001850-RB
						AAEL001794-RB
						AAEL002961-RA
						AAEL002826-RA
						AAEL009801-RA
						AAEL003053-RC
						AAEL002347-RA
						AAEL006594-RA
						AAEL007220-RA
						AAEL002295-RA
						AAEL013323-RA
						AAEL011929-RA
						AAEL014759-RA
						AAEL001687-RA
						AAEL010628-RA
						AAEL007608-RA
						AAEL008781-RA
						AAEL006846-RA
						AAEL009622-RA
						AAEL015102-RA
						AAEL003091-RA
						AAEL010273-RA
						AAEL004907-RA
						AAEL007972-RA
						AAEL012640-RA
						AAEL012075-RA
						AAEL003565-RA
						AAEL004230-RB
						AAEL004961-RA
						AAEL005714-RA
						AAEL008386-RA
						AAEL003966-RA
						AAEL002070-RA
						AAEL012432-RA
						AAEL012429-RA
						AAEL004281-RA
						AAEL006573-RA
						AAEL005189-RA
						AAEL011823-RA
						AAEL001794-RA
						AAEL004246-RA
						AAEL005645-RA
						AAEL015479-RA
						AAEL007121-RA
						AAEL014188-RA
						AAEL003060-RA
						AAEL010946-RA
						AAEL008168-RA
						AAEL013881-RA
						AAEL014069-RA
						AAEL014605-RA
						AAEL006793-RA
						AAEL000101-RA
						AAEL005660-RA
						AAEL015327-RA
						AAEL011766-RA
						AAEL006034-RA
						AAEL001936-RA
						AAEL002566-RA
						AAEL011898-RA
						AAEL008626-RA
						AAEL006365-RA
						AAEL002165-RA
						AAEL005594-RA
						AAEL009247-RA
						AAEL005401-RB
						AAEL012528-RA
						AAEL013703-RA
						AAEL006217-RA
						AAEL006218-RA
						AAEL006119-RA
						AAEL005616-RA
						AAEL002858-RA
						AAEL006701-RA
						AAEL012587-RA
						AAEL014621-RA
						AAEL015477-RA
						AAEL008596-RA
						AAEL006351-RA
						AAEL004416-RB
						AAEL003741-RA
						AAEL009466-RA
						AAEL009488-RA
						AAEL014239-RA
						AAEL008892-RA
						AAEL002877-RA
						AAEL003979-RA
						AAEL000176-RA
						AAEL012748-RA
						AAEL010624-RA
						AAEL007778-RA
						AAEL004296-RA
						AAEL010413-RA
						AAEL015063-RA
						AAEL011088-RA
						AAEL003792-RA
						AAEL006953-RA
						AAEL002623-RA
						AAEL002962-RA
						AAEL001391-RA
						AAEL007148-RA
						AAEL009564-RA
						AAEL014552-RA
						AAEL000907-RA
						AAEL008745-RA
						AAEL013428-RA
						AAEL000576-RA
						AAEL006383-RA
						AAEL015105-RA
						AAEL002757-RA
						AAEL003842-RA
						AAEL008466-RA
						AAEL003740-RA
						AAEL007190-RA
						AAEL008092-RA
						AAEL011818-RA
						AAEL008745-RB
						AAEL005200-RA
						AAEL009314-RA
						AAEL008219-RA
						AAEL003728-RA
						AAEL005121-RA
						AAEL008909-RA
						AAEL012400-RA
						AAEL006468-RA
						AAEL014125-RA
						AAEL015022-RA
						AAEL007756-RA
						AAEL000496-RA
						AAEL003708-RA
						AAEL009904-RA
						AAEL008199-RA
						AAEL004495-RA
						AAEL000484-RA
						AAEL003363-RA
						AAEL000639-RA
						AAEL007792-RA
						AAEL004179-RA
						AAEL006377-RA
						AAEL005401-RA
						AAEL003520-RA
						AAEL005960-RA
						AAEL000580-RA
						AAEL008271-RA
						AAEL006203-RA
						AAEL010616-RA
						AAEL008202-RA
						AAEL008670-RA
						AAEL009593-RA
						AAEL004402-RA
						AAEL008043-RA
						AAEL011634-RA
						AAEL007090-RA
						AAEL004898-RA
						AAEL009558-RA
						AAEL009697-RA
						AAEL005654-RA
						AAEL009098-RA
						AAEL007832-RA
						AAEL012771-RA
						AAEL004118-RA
						AAEL000049-RA
						AAEL006424-RA
						AAEL008943-RA
						AAEL014724-RA
						AAEL000266-RA
						AAEL011139-RA
						AAEL013850-RA
						AAEL003131-RA
						AAEL009947-RA
						AAEL010613-RA
						AAEL008227-RA
						AAEL000236-RA
						AAEL010688-RA
						AAEL015037-RA
						AAEL012763-RA
						AAEL014765-RA
						AAEL010369-RA
						AAEL012048-RA
						AAEL012457-RA
						AAEL007413-RA
						AAEL005336-RA
						AAEL010222-RB
						AAEL005746-RA
						AAEL014824-RA
						AAEL015665-RA
						AAEL014044-RA
						AAEL007386-RA
						AAEL002517-RA
						AAEL002517-RB
						AAEL010886-RA
						AAEL007195-RA
						AAEL011374-RA
						AAEL003107-RA
						AAEL013645-RA
						AAEL004581-RA
						AAEL010222-RA
						AAEL006128-RA
						AAEL000213-RA
						AAEL002630-RA
						AAEL003831-RA
						AAEL014708-RA
						AAEL013750-RA
						AAEL000062-RA
						AAEL006162-RA
						AAEL014033-RA
						AAEL007028-RA
						AAEL010344-RA
						AAEL006980-RA
						AAEL005671-RA
						AAEL011613-RA
						AAEL009091-RA
						AAEL007779-RA
						AAEL007281-RA
						AAEL007519-RA
						AAEL008190-RA
						AAEL005531-RA
						AAEL009929-RA
						AAEL000845-RA
						AAEL004588-RA
						AAEL013838-RA
						AAEL005989-RA
						AAEL008164-RA
						AAEL005431-RA
						AAEL015443-RA
						AAEL002954-RA
						AAEL007142-RA
						AAEL000786-RA
						AAEL007216-RA
						AAEL003253-RA
						AAEL014370-RA
						AAEL004277-RA
						AAEL011593-RA
						AAEL005718-RA
						AAEL013409-RA
						AAEL001912-RA
						AAEL001812-RA
						AAEL000479-RA
						AAEL015563-RA
						AAEL002661-RA
						AAEL010232-RA
						AAEL009521-RA
						AAEL010969-RA
						AAEL010426-RA
						AAEL011304-RA
						AAEL009805-RA
						AAEL000097-RA
						AAEL002457-RB
						AAEL005977-RA
						AAEL008558-RA
						AAEL002720-RA
						AAEL010031-RA
						AAEL003369-RA
						AAEL003983-RA
						AAEL000060-RA
						AAEL008858-RA
						AAEL007363-RA
						AAEL007732-RA
						AAEL002457-RA
						AAEL014817-RA
						AAEL010480-RA
						AAEL000121-RA
						AAEL000387-RA
						AAEL007180-RA
						AAEL012344-RA
						AAEL014920-RA
						AAEL010511-RA
						AAEL003886-RA
						AAEL007393-RA
						AAEL007723-RA
						AAEL000294-RA
						AAEL011783-RA
						AAEL013040-RB
						AAEL011501-RA
						AAEL007659-RA
						AAEL014439-RA
						AAEL005011-RA
						AAEL010626-RA
						AAEL010166-RA
						AAEL010276-RA
						AAEL006214-RA
						AAEL013354-RA
						AAEL001863-RA
						AAEL011349-RA
						AAEL004246-RB
						AAEL008501-RA
						AAEL005957-RA
						AAEL006708-RA
						AAEL011375-RA
						AAEL000438-RA
						AAEL006323-RA
						AAEL003003-RA
						AAEL000024-RA
						AAEL012343-RA
						AAEL014917-RA
						AAEL004941-RA
						AAEL002361-RA
						AAEL006592-RA
						AAEL000599-RA
						AAEL010740-RA
						AAEL001195-RA
						AAEL000516-RA
						AAEL014668-RA
						AAEL001676-RA
						AAEL000402-RA
						AAEL004932-RA
						AAEL010686-RA
						AAEL007147-RA
						AAEL000044-RB
						AAEL007373-RA
						AAEL014333-RA
						AAEL006822-RA
						AAEL004160-RA
						AAEL008360-RA
						AAEL007111-RA
						AAEL000342-RA
						AAEL010988-RA
						AAEL002610-RA
						AAEL009780-RA
						AAEL013040-RA
						AAEL005800-RA
						AAEL010120-RA
						AAEL008050-RA
						AAEL015639-RA
						AAEL001478-RA
						AAEL011439-RA
						AAEL002131-RA
						AAEL003262-RA
						AAEL014829-RA
						AAEL000196-RA
						AAEL015560-RA
						AAEL008566-RA
						AAEL011403-RA
						AAEL015162-RA
						AAEL009404-RA
						AAEL009669-RA
						AAEL012920-RA
						AAEL006042-RA
						AAEL011292-RA
						AAEL002982-RA
						AAEL003345-RA
						AAEL008336-RA
						AAEL001818-RA
						AAEL012785-RA
						AAEL005920-RA
						AAEL005004-RA
						AAEL010193-RA
						AAEL006371-RA
						AAEL005776-RA
						AAEL003566-RA
						AAEL003320-RA
						AAEL000536-RA
						AAEL005151-RA
						AAEL007452-RA
						AAEL001658-RA
						AAEL006058-RA
						AAEL011086-RA
						AAEL012162-RA
						AAEL005409-RA
						AAEL007197-RA
						AAEL001374-RA
						AAEL002307-RA
						AAEL012144-RA
						AAEL007024-RA
						AAEL000340-RA
						AAEL005299-RA
						AAEL008229-RA
						AAEL011001-RA
						AAEL000243-RA
						AAEL000910-RA
						AAEL003056-RA
						AAEL007808-RA
						AAEL004091-RA
						AAEL014635-RA
						AAEL014019-RA
						AAEL011854-RA
						AAEL006352-RA
						AAEL011981-RA
						AAEL011241-RA
						AAEL010630-RA
						AAEL010735-RA
						AAEL005533-RA
						AAEL003102-RA
						AAEL003772-RA
						AAEL009133-RA
						AAEL011620-RA
						AAEL010386-RA
						AAEL002997-RA
						AAEL004941-RB
						AAEL010539-RA
						AAEL011998-RA
						AAEL009334-RA
						AAEL009536-RA
						AAEL001063-RA
						AAEL001320-RA
						AAEL002200-RA
						AAEL000859-RA
						AAEL009591-RA
						AAEL012923-RA
						AAEL011717-RA
						AAEL006784-RA
						AAEL002535-RA
						AAEL014614-RA
						AAEL006798-RA
						AAEL001517-RA
						AAEL001404-RA
						AAEL000623-RA
						AAEL005076-RA
						AAEL003928-RA
						AAEL014520-RA
						AAEL001671-RA
						AAEL004214-RA
						AAEL002929-RA
						AAEL008426-RA
						AAEL006824-RA
						AAEL010348-RA
						AAEL003583-RA
						AAEL007557-RA
						AAEL015631-RA
						AAEL004330-RA
						AAEL005210-RA
						AAEL007347-RA
						AAEL014163-RA
						AAEL003192-RA
						AAEL007935-RA
						AAEL015116-RA
						AAEL004240-RA
						AAEL004032-RA
						AAEL006097-RA
						AAEL000646-RA
						AAEL009236-RA
						AAEL009043-RA
						AAEL013140-RA
						AAEL009863-RA
						AAEL009863-RB
						AAEL003462-RA
						AAEL001571-RA
						AAEL013788-RA
						AAEL001503-RA
						AAEL006434-RA
						AAEL007403-RA
						AAEL014740-RA
						AAEL002343-RA
						AAEL001353-RA
						AAEL009310-RA
						AAEL004669-RA
						AAEL006019-RD
						AAEL006019-RB
						AAEL001073-RA
						AAEL006019-RA
						AAEL015078-RA
						AAEL012285-RA
						AAEL004003-RA
						AAEL003586-RA
						AAEL004778-RA
						AAEL003129-RA
						AAEL012131-RA
						AAEL000298-RA
						AAEL006019-RC
						AAEL015458-RA
						AAEL001347-RA
						AAEL004133-RA
						AAEL003024-RA
						AAEL012949-RA
						AAEL005243-RA
						AAEL012613-RA
						AAEL013271-RA
						AAEL006452-RA
						AAEL012104-RA
						AAEL006216-RA
						AAEL011760-RA
						AAEL002622-RA
						AAEL015662-RA
						AAEL004258-RA
						AAEL001457-RA
						AAEL006014-RA
						AAEL013498-RA
						AAEL013492-RA
						AAEL005333-RA
						AAEL009939-RA
						AAEL005983-RA
						AAEL012092-RA
						AAEL013015-RA
						AAEL000134-RA
						AAEL010839-RA
						AAEL005432-RA
						AAEL012225-RA
						AAEL010647-RA
						AAEL005432-RB
						AAEL003642-RA
						AAEL003318-RA
						AAEL005345-RA
						AAEL014660-RA
						AAEL000771-RA
						AAEL003910-RA
						AAEL008840-RA
						AAEL010523-RA
						AAEL007415-RA
						AAEL009035-RA
						AAEL004964-RA
						AAEL009705-RA
						AAEL011867-RA
						AAEL007455-RA
						AAEL009594-RA
						AAEL005575-RA
						AAEL003413-RA
						AAEL014742-RA
						AAEL000251-RA
						AAEL007618-RA
						AAEL013804-RA
						AAEL000567-RA
						AAEL013322-RA
						AAEL007316-RA
						AAEL007691-RA
						AAEL010084-RA
						AAEL008421-RA
						AAEL000334-RA
						AAEL002126-RA
						AAEL011551-RA
						AAEL012099-RA
						AAEL002066-RA
						AAEL012778-RB
						AAEL012562-RA
						AAEL008752-RA
						AAEL002922-RA
						AAEL011350-RA
						AAEL012110-RA
						AAEL007004-RA
						AAEL012300-RA
						AAEL009055-RA
						AAEL012778-RA
						AAEL012249-RA
						AAEL013947-RA
						AAEL002724-RA
						AAEL014426-RA
						AAEL003168-RA
						AAEL006148-RA
						AAEL004777-RA
						AAEL013860-RA
						AAEL001467-RA
						AAEL011699-RA
						AAEL006138-RA
						AAEL010833-RA
						AAEL003941-RA
						AAEL001469-RA
						AAEL013381-RA
						AAEL010772-RA
						AAEL004678-RA
						AAEL012556-RA
						AAEL005967-RA
						AAEL007967-RB
						AAEL010380-RA
						AAEL000405-RA
						AAEL007967-RA
						AAEL005754-RA
						AAEL006806-RA
						AAEL014591-RA
						AAEL000153-RA
						AAEL007276-RA
						AAEL008414-RA
						AAEL008940-RA
						AAEL001477-RA
						AAEL005809-RA
						AAEL001196-RA
						AAEL006004-RA
						AAEL005720-RA
						AAEL002896-RA
						AAEL009915-RA
						AAEL007742-RA
						AAEL008610-RA
						AAEL005044-RA
						AAEL013559-RA
						AAEL011565-RA
						AAEL005529-RA
						AAEL000885-RA
						AAEL008855-RA
						AAEL005319-RA
						AAEL009881-RA
						AAEL000011-RA
						AAEL000027-RA
						AAEL000031-RA
						AAEL000036-RA
						AAEL000047-RA
						AAEL000052-RA
						AAEL000056-RA
						AAEL000063-RA
						AAEL000069-RA
						AAEL000071-RA
						AAEL000075-RA
						AAEL000082-RA
						AAEL000085-RA
						AAEL000112-RA
						AAEL000113-RA
						AAEL000114-RA
						AAEL000120-RA
						AAEL000130-RA
						AAEL000132-RA
						AAEL000144-RA
						AAEL000151-RA
						AAEL000169-RA
						AAEL000195-RA
						AAEL000216-RA
						AAEL000225-RA
						AAEL000229-RA
						AAEL000280-RA
						AAEL000306-RA
						AAEL000320-RA
						AAEL000323-RA
						AAEL000344-RA
						AAEL000347-RA
						AAEL000350-RA
						AAEL000351-RA
						AAEL000357-RA
						AAEL000359-RA
						AAEL000366-RA
						AAEL000373-RA
						AAEL000382-RA
						AAEL000384-RA
						AAEL000391-RA
						AAEL000413-RA
						AAEL000420-RA
						AAEL000441-RA
						AAEL000447-RA
						AAEL000453-RA
						AAEL000455-RA
						AAEL000462-RA
						AAEL000480-RA
						AAEL000533-RA
						AAEL000535-RA
						AAEL000542-RA
						AAEL000547-RA
						AAEL000552-RA
						AAEL000556-RA
						AAEL000585-RA
						AAEL000592-RA
						AAEL000595-RA
						AAEL000609-RA
						AAEL000613-RA
						AAEL000614-RA
						AAEL000616-RA
						AAEL000618-RA
						AAEL000626-RA
						AAEL000628-RA
						AAEL000631-RA
						AAEL000665-RA
						AAEL000678-RA
						AAEL000680-RA
						AAEL000681-RA
						AAEL000684-RA
						AAEL000688-RA
						AAEL000690-RA
						AAEL000694-RA
						AAEL000705-RA
						AAEL000710-RA
						AAEL000725-RA
						AAEL000726-RA
						AAEL000732-RA
						AAEL000748-RA
						AAEL000749-RA
						AAEL000751-RA
						AAEL000775-RA
						AAEL000777-RA
						AAEL000801-RA
						AAEL000808-RA
						AAEL000813-RA
						AAEL000821-RA
						AAEL000843-RA
						AAEL000869-RA
						AAEL000870-RA
						AAEL000871-RA
						AAEL000873-RA
						AAEL000881-RA
						AAEL000882-RA
						AAEL000887-RA
						AAEL000890-RA
						AAEL000896-RA
						AAEL000913-RA
						AAEL000914-RA
						AAEL000916-RA
						AAEL000917-RA
						AAEL000919-RA
						AAEL000921-RA
						AAEL000926-RA
						AAEL000928-RA
						AAEL000929-RA
						AAEL000932-RA
						AAEL001021-RA
						AAEL001028-RA
						AAEL001051-RA
						AAEL001054-RA
						AAEL001057-RA
						AAEL001072-RA
						AAEL001076-RA
						AAEL001081-RA
						AAEL001096-RA
						AAEL001123-RA
						AAEL001213-RA
						AAEL001221-RA
						AAEL001224-RA
						AAEL001229-RA
						AAEL001234-RA
						AAEL001237-RA
						AAEL001258-RA
						AAEL001263-RA
						AAEL001265-RA
						AAEL001272-RA
						AAEL001286-RA
						AAEL001301-RA
						AAEL001303-RA
						AAEL001310-RA
						AAEL001311-RA
						AAEL001330-RA
						AAEL001335-RA
						AAEL001342-RA
						AAEL001364-RA
						AAEL001418-RA
						AAEL001452-RA
						AAEL001461-RA
						AAEL001487-RA
						AAEL001489-RA
						AAEL001510-RA
						AAEL001514-RA
						AAEL001537-RA
						AAEL001550-RA
						AAEL001575-RA
						AAEL001608-RA
						AAEL001611-RA
						AAEL001617-RA
						AAEL001621-RA
						AAEL001634-RA
						AAEL001650-RA
						AAEL001674-RA
						AAEL001685-RA
						AAEL001689-RA
						AAEL001694-RA
						AAEL001704-RA
						AAEL001728-RA
						AAEL001736-RA
						AAEL001745-RA
						AAEL001788-RA
						AAEL001801-RA
						AAEL001821-RA
						AAEL001822-RA
						AAEL001826-RA
						AAEL001836-RA
						AAEL001841-RA
						AAEL001878-RA
						AAEL001882-RA
						AAEL001895-RA
						AAEL001899-RA
						AAEL001911-RA
						AAEL001923-RA
						AAEL001970-RA
						AAEL001975-RA
						AAEL001981-RA
						AAEL001989-RA
						AAEL001994-RA
						AAEL002000-RA
						AAEL002003-RA
						AAEL002011-RA
						AAEL002015-RA
						AAEL002026-RA
						AAEL002027-RA
						AAEL002028-RA
						AAEL002030-RA
						AAEL002034-RA
						AAEL002040-RA
						AAEL002052-RA
						AAEL002072-RA
						AAEL002085-RA
						AAEL002132-RA
						AAEL002149-RA
						AAEL002150-RA
						AAEL002167-RA
						AAEL002177-RA
						AAEL002180-RA
						AAEL002188-RA
						AAEL002189-RA
						AAEL002197-RA
						AAEL002199-RA
						AAEL002201-RA
						AAEL002202-RA
						AAEL002208-RA
						AAEL002210-RA
						AAEL002212-RA
						AAEL002217-RA
						AAEL002239-RA
						AAEL002243-RA
						AAEL002245-RA
						AAEL002255-RA
						AAEL002270-RA
						AAEL002273-RA
						AAEL002274-RA
						AAEL002275-RA
						AAEL002313-RA
						AAEL002353-RA
						AAEL002355-RA
						AAEL002356-RA
						AAEL002383-RA
						AAEL002393-RA
						AAEL002400-RA
						AAEL002405-RA
						AAEL002410-RA
						AAEL002425-RA
						AAEL002432-RA
						AAEL002439-RA
						AAEL002440-RA
						AAEL002441-RA
						AAEL002447-RA
						AAEL002449-RA
						AAEL002452-RA
						AAEL002458-RA
						AAEL002460-RA
						AAEL002466-RA
						AAEL002476-RA
						AAEL002490-RA
						AAEL002500-RA
						AAEL002584-RA
						AAEL002588-RA
						AAEL002591-RA
						AAEL002605-RA
						AAEL002609-RA
						AAEL002611-RA
						AAEL002613-RA
						AAEL002619-RA
						AAEL002625-RA
						AAEL002627-RA
						AAEL002631-RA
						AAEL002656-RA
						AAEL002657-RA
						AAEL002667-RA
						AAEL002671-RA
						AAEL002674-RA
						AAEL002679-RA
						AAEL002682-RA
						AAEL002689-RA
						AAEL002690-RA
						AAEL002697-RA
						AAEL002699-RA
						AAEL002713-RA
						AAEL002715-RA
						AAEL002725-RA
						AAEL002732-RA
						AAEL002794-RA
						AAEL002859-RA
						AAEL002878-RA
						AAEL002904-RA
						AAEL002907-RA
						AAEL002911-RA
						AAEL002914-RA
						AAEL002915-RA
						AAEL002927-RA
						AAEL002931-RA
						AAEL002947-RA
						AAEL002955-RA
						AAEL002955-RB
						AAEL002960-RA
						AAEL002965-RA
						AAEL002977-RA
						AAEL003023-RA
						AAEL003033-RA
						AAEL003042-RA
						AAEL003045-RA
						AAEL003057-RA
						AAEL003057-RB
						AAEL003111-RA
						AAEL003114-RA
						AAEL003134-RA
						AAEL003156-RA
						AAEL003177-RA
						AAEL003187-RA
						AAEL003195-RA
						AAEL003196-RA
						AAEL003197-RA
						AAEL003198-RA
						AAEL003201-RA
						AAEL003218-RA
						AAEL003222-RA
						AAEL003222-RB
						AAEL003225-RA
						AAEL003231-RA
						AAEL003241-RA
						AAEL003260-RA
						AAEL003265-RA
						AAEL003266-RA
						AAEL003272-RA
						AAEL003274-RA
						AAEL003284-RA
						AAEL003311-RA
						AAEL003315-RA
						AAEL003328-RA
						AAEL003329-RA
						AAEL003335-RA
						AAEL003340-RA
						AAEL003341-RA
						AAEL003350-RA
						AAEL003353-RA
						AAEL003395-RA
						AAEL003410-RA
						AAEL003440-RA
						AAEL003450-RA
						AAEL003458-RA
						AAEL003496-RA
						AAEL003500-RA
						AAEL003556-RA
						AAEL003576-RA
						AAEL003589-RA
						AAEL003603-RA
						AAEL003607-RA
						AAEL003620-RA
						AAEL003655-RA
						AAEL003694-RA
						AAEL003702-RA
						AAEL003711-RA
						AAEL003715-RA
						AAEL003721-RA
						AAEL003751-RA
						AAEL003753-RA
						AAEL003778-RA
						AAEL003843-RA
						AAEL003849-RA
						AAEL003884-RA
						AAEL003890-RA
						AAEL003892-RA
						AAEL003900-RA
						AAEL003905-RA
						AAEL003982-RA
						AAEL003999-RA
						AAEL004001-RA
						AAEL004005-RA
						AAEL004011-RA
						AAEL004012-RA
						AAEL004024-RA
						AAEL004033-RA
						AAEL004092-RA
						AAEL004103-RA
						AAEL004153-RA
						AAEL004159-RA
						AAEL004162-RA
						AAEL004189-RA
						AAEL004203-RA
						AAEL004218-RA
						AAEL004226-RA
						AAEL004270-RA
						AAEL004275-RA
						AAEL004298-RA
						AAEL004323-RA
						AAEL004339-RA
						AAEL004353-RA
						AAEL004367-RA
						AAEL004374-RA
						AAEL004424-RA
						AAEL004442-RA
						AAEL004466-RA
						AAEL004481-RA
						AAEL004487-RA
						AAEL004499-RA
						AAEL004505-RA
						AAEL004535-RA
						AAEL004557-RA
						AAEL004573-RA
						AAEL004584-RA
						AAEL004585-RA
						AAEL004590-RA
						AAEL004596-RA
						AAEL004597-RA
						AAEL004599-RA
						AAEL004605-RA
						AAEL004648-RA
						AAEL004677-RA
						AAEL004679-RA
						AAEL004693-RA
						AAEL004703-RA
						AAEL004705-RA
						AAEL004712-RA
						AAEL004714-RA
						AAEL004724-RA
						AAEL004735-RA
						AAEL004770-RA
						AAEL004786-RA
						AAEL004788-RA
						AAEL004840-RA
						AAEL004847-RA
						AAEL004857-RA
						AAEL004872-RA
						AAEL004915-RA
						AAEL004921-RA
						AAEL004923-RA
						AAEL004925-RA
						AAEL004929-RA
						AAEL004933-RA
						AAEL004944-RA
						AAEL004947-RA
						AAEL004949-RA
						AAEL004959-RA
						AAEL004966-RA
						AAEL004996-RA
						AAEL005010-RA
						AAEL005034-RA
						AAEL005096-RA
						AAEL005104-RA
						AAEL005119-RA
						AAEL005155-RA
						AAEL005157-RA
						AAEL005176-RA
						AAEL005184-RA
						AAEL005188-RA
						AAEL005207-RA
						AAEL005222-RA
						AAEL005226-RA
						AAEL005280-RA
						AAEL005301-RA
						AAEL005340-RA
						AAEL005352-RA
						AAEL005371-RA
						AAEL005373-RA
						AAEL005456-RA
						AAEL005490-RA
						AAEL005516-RA
						AAEL005537-RA
						AAEL005548-RA
						AAEL005551-RA
						AAEL005623-RA
						AAEL005630-RA
						AAEL005658-RA
						AAEL005682-RA
						AAEL005687-RA
						AAEL005691-RA
						AAEL005692-RA
						AAEL005698-RA
						AAEL005702-RA
						AAEL005710-RA
						AAEL005711-RA
						AAEL005724-RA
						AAEL005758-RA
						AAEL005761-RA
						AAEL005764-RA
						AAEL005775-RA
						AAEL005787-RA
						AAEL005788-RA
						AAEL005834-RA
						AAEL005836-RA
						AAEL005842-RA
						AAEL005865-RA
						AAEL005876-RA
						AAEL005891-RA
						AAEL005907-RA
						AAEL005912-RA
[truncated: 14,790 more rows]
