# Supplementary material for: Identification of Early Zygotic Genes in the Yellow Fever Mosquito Aedes aegypti and Discovery of a Motif Involved in Early Zygotic Genome Activation
Source: PLoS One. 2012 Mar 23;7(3):e33933. doi: 10.1371/journal.pone.0033933 (PMC3311545; doi:10.1371/journal.pone.0033933)
Supplement: File S4 — Tabulated summary of SCOPE output. (XLSX) [file pone.0033933.s004.xlsx]

## Sheet: Sheet1
bp upstream of TSS	Rank	Motif	Count	Significance	Coverage (%)
200	1	BRGVTA	147	63.2	82.5
	2	AGGTA	52	36.4	52.4
	3	TNAHHHDHHTACCTA	11	34.4	17.5
	4	WTNSAMGTGR	14	30	17.5
	5	GAAHKHNBDKVHWTTATA	10	29.9	11.1
	6	TTCADHTAC	13	25.9	14.3
	7	TCAGAYDCAT	7	22.2	11.1
	8	AGCTACCAGA	6	21.1	9.5
	9	GGGTA	32	20.4	33.3
	10	AGTGAGA	9	20.3	9.5
400	1	VBRGGTA	104	87.8	63.5
	2	YNAHHHDHHTACCTA	15	42.1	19
	3	AGYHHNNDAGCTW	19	40.2	12.7
	4	ATDCWANTGA	15	32.7	20.6
	5	GTADCTGAA	12	32.5	12.7
	6	TCTCACTW	14	27.5	17.5
	7	AAGNNDNNBNATTC	14	24.9	17.5
	8	GGGTA	57	24.9	44.4
	9	ATATMMARGMC	8	23.6	7.9
	10	ATTBNNDNDNAGAAT	14	22.2	11.1
800	1	AAGCTWSBHMSC	41	150.7	3.2
	2	VYRGGTA	117	86.4	74.6
	3	TTCBVDGAAGCT	17	63.4	4.8
	4	WAGTGAGA	15	30.2	19
	5	TATVADRG	24	29.2	25.4
	6	GGGTA	85	26.5	58.7
	7	CAGWTAYAT	11	25.4	17.5
	8	ATTCAAGT	13	15	19
1000	1	AAGCTHNNDAGCT	40	154.8	4.8
	2	AAGCTBYWNNNNMDNAGCT	34	138.4	3.2
	3	VYRGGTA	125	83.2	79.4
	4	AGGTA	156	50	87.3
	5	GGVTMTAVAARAC	8	26.8	12.7
	6	WAGTGAGA	15	25.4	19
	7	GGGTA	97	25.1	63.5
	8	CAGWTAYAT	11	24.8	17.5
	9	TTCAGAVT	24	21.3	19
	10	ATKCAAGDBAT	11	17.7	17.5
1500	1	AGAWGCTWSSWM	41	164.4	7.9
	2	GRRYYCTGA	57	60.8	22.2
	3	BRGGTA	141	51.9	81
	4	ARGGAYTCTC	17	46.9	3.2
	5	AGGTA	200	44.1	88.9
	6	AGAATCCT	34	41.4	7.9
	7	WAGTGAGA	17	27.1	19
	8	GGGTA	132	21.3	79.4
2500	1	AGRATNCTGA	113	273.7	11.1
	2	AAGCTWSNWMSC	49	173.9	3.2
	3	GATTCTCT	51	109.3	9.5
