# Supplementary material for: Identification of Early Zygotic Genes in the Yellow Fever Mosquito Aedes aegypti and Discovery of a Motif Involved in Early Zygotic Genome Activation
Source: PubMed Central journal article supplement (PMC3311545; doi:10.1371/journal.pone.0033933), 2012-03-23

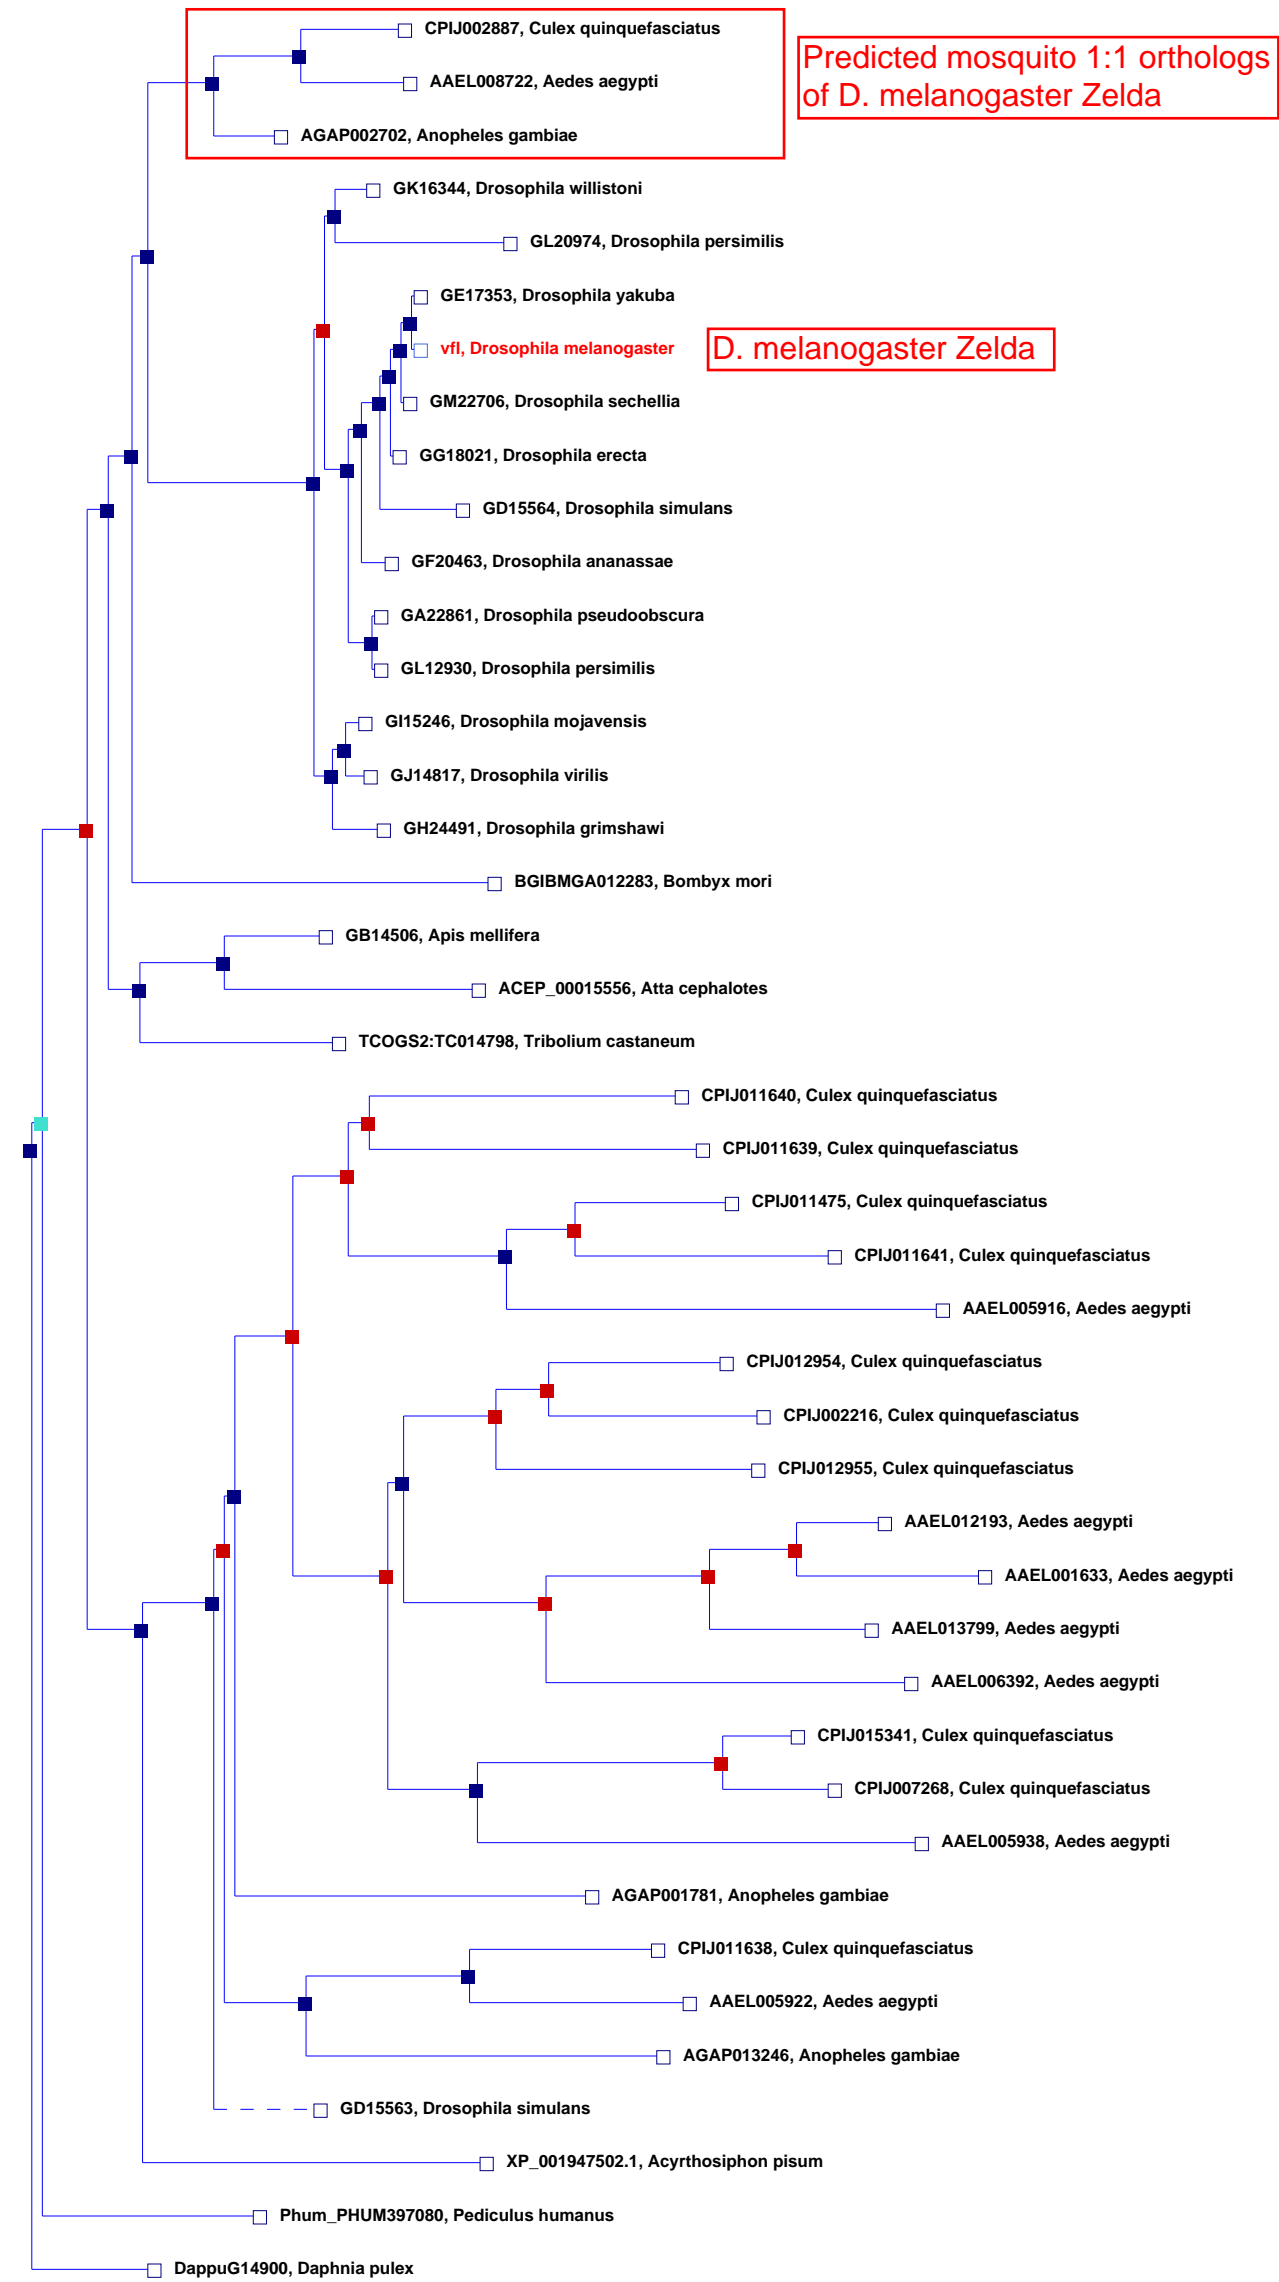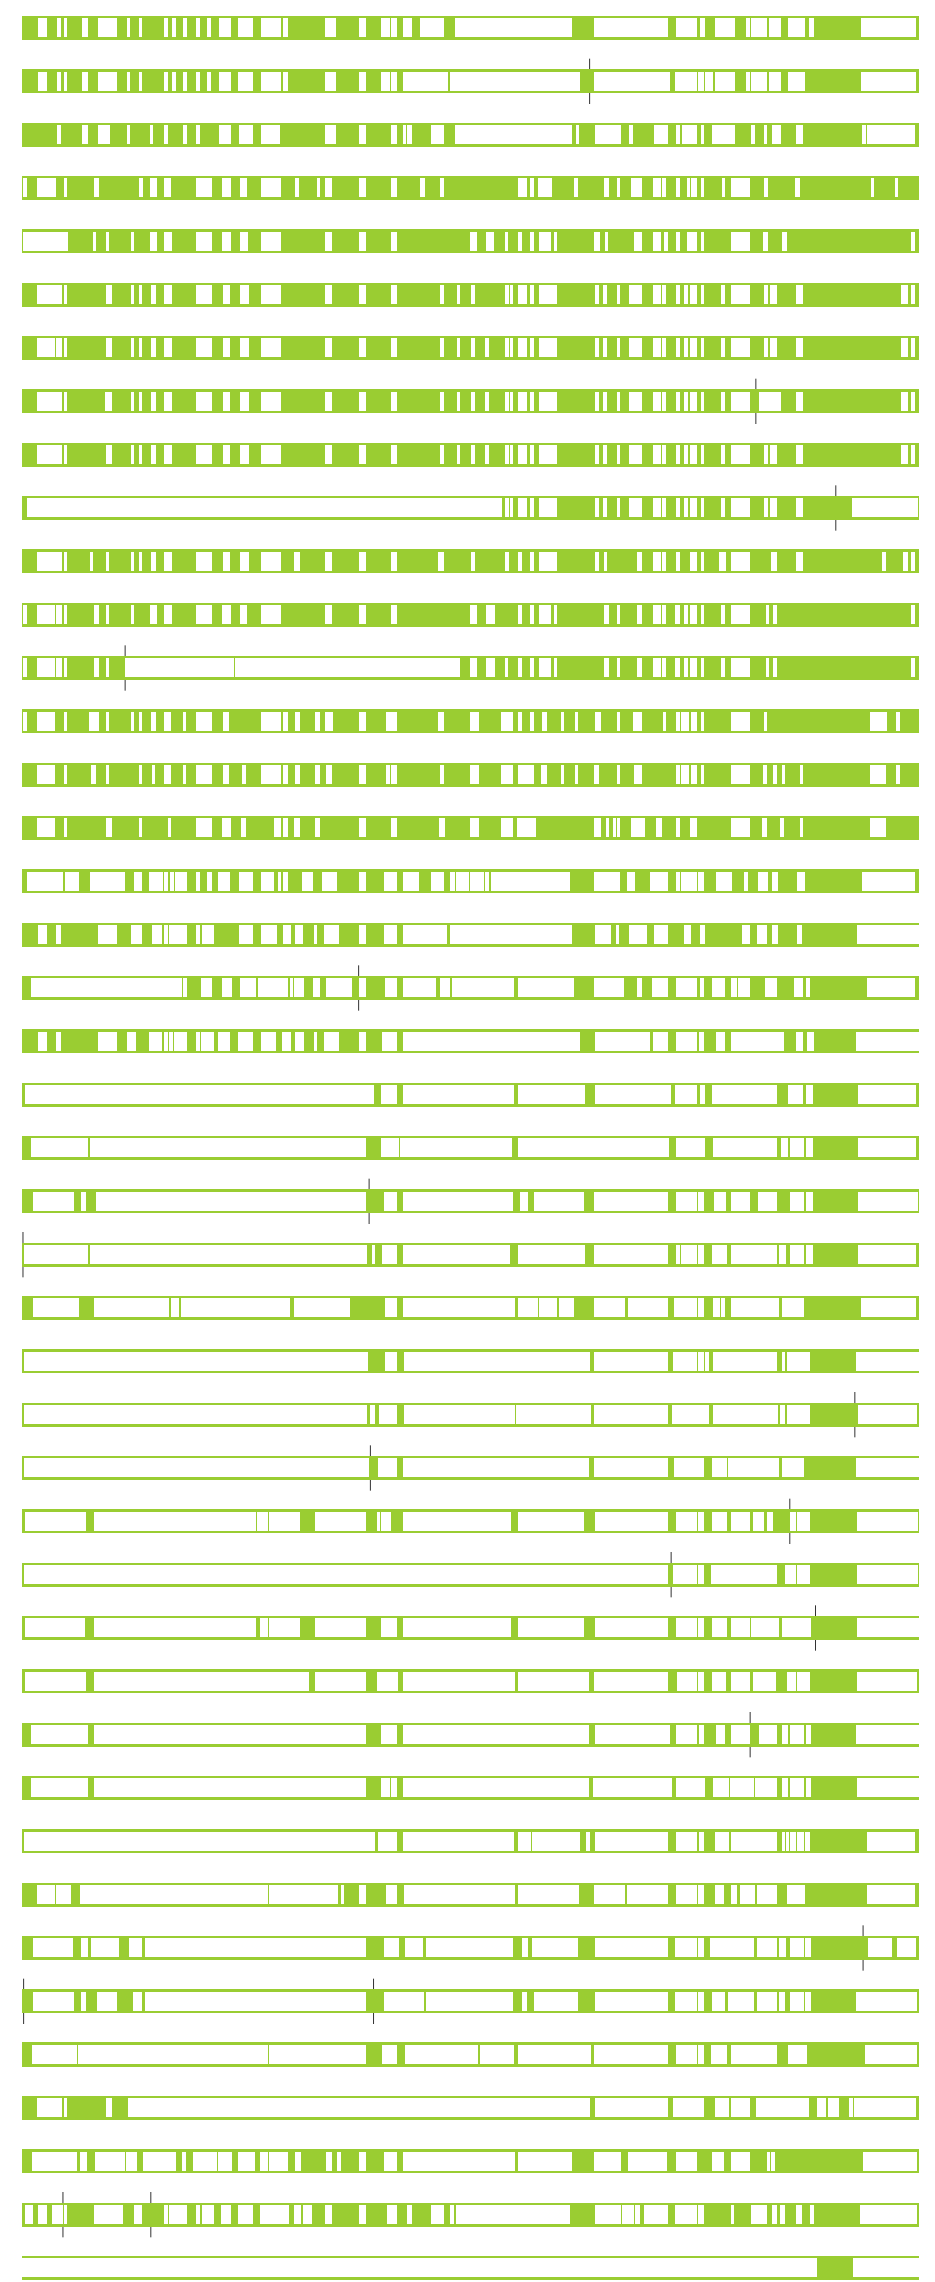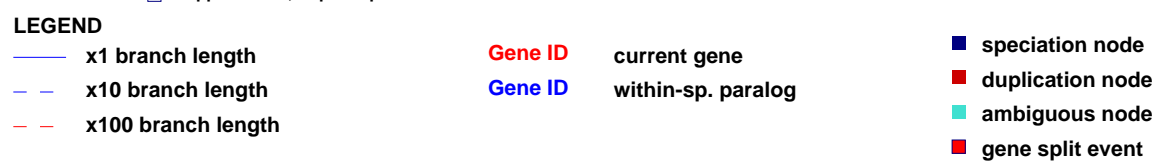

Supplement: pone.0033933.s007.pdf [file pone.0033933.s007.pdf]
